# Supplementary material for: Butyrate promotes C2C12 myoblast proliferation by activating ERK/MAPK pathway
Source: Royal Society of Chemistry journal article supplement (doi:10.1039/d2mo00256f), 2023-05-19
Supplement: d2mo00256f2.pdf [file d2mo00256f2.pdf]

The RNA-seq data has uploaded to the GEO database. Our Series record is **GSE214364**. To review GEO accession GSE214364:

Go to <https://www.ncbi.nlm.nih.gov/geo/query/acc.cgi?acc=GSE214364>

Enter token **ajejaesgtnexdq**n into the box

The metabolite data has uploaded to the Metabolights (<https://www.ebi.ac.uk/metabolights/>), and our project ID is **MTBLS6033**. You can access our study here: <https://www.ebi.ac.uk/metabolights/MTBLS6033>
