# Supplementary material for: Butyrate promotes C2C12 myoblast proliferation by activating ERK/MAPK pathway
Source: Royal Society of Chemistry journal article supplement (doi:10.1039/d2mo00256f), 2023-05-19
Supplement: d2mo00256f3.pdf [file d2mo00256f3.pdf]

**Table S1.** Antibody details and dilution ratios.

| antibody name                                   | catalog number        | dilution ratio |
|-------------------------------------------------|-----------------------|----------------|
| $\beta$ -Tubulin(HRP Conjugate)                 | 5346S(CST)            | 1:500          |
| Anti-MyoD Antibody                              | sc-377460(Santa Cruz) | 1:1000         |
| Anti-Myf5 antibody                              | ab125301(Abcam)       | 1:1000         |
| Anti-p15 INK4b                                  | ab53034(Abcam)        | 1:1000         |
| Anti-p16 ARC                                    | ab51243(Abcam)        | 1:1000         |
| Anti-CDKN2A/p19ARF                              | ab80(Abcam)           | 1:1000         |
| Phospho-p44/42 MAPK (Erk1/2)<br>(Thr202/Tyr204) | 4370T(CST)            | 1:1000         |
| p44/42 MAPK (Erk1/2)                            | 4695T(CST)            | 1:1000         |
| Phospho-SAPK/JNK<br>(Thr183/Tyr185)             | 9251S(CST)            | 1:1000         |
| SAPK/JNK Antibody                               | 9252S(CST)            | 1:1000         |
| p38 MAPK                                        | 8690(CST)             | 1:1000         |
| Phospho-p38 MAPK<br>(Thr180/Tyr182)             | 4511(CST)             | 1:1000         |
| Anti-mouse IgG                                  | 7076(CST)             | 1:2000         |
| Anti-rabbit IgG                                 | 7074P2(CST)           | 1:2000         |

**Table S2.** The primers used in the real-time PCR.

| gene name | forward primer         | reverse primer       |
|-----------|------------------------|----------------------|
| tubulin   | TGGA CTCTGTT CGCTCAGGT | TGCCTCCTTCCGTACCACAT |
| MyoD      | GCCTGAGCAAAGTGAATGAG   | GCAGACCTTCGATGTAGCG  |
| Myf5      | TGAGGGAACAGGTGGAGAAC   | AGCTGGACACGGAGCTTTTA |
