# Supplementary material for: Butyrate promotes C2C12 myoblast proliferation by activating ERK/MAPK pathway
Source: Royal Society of Chemistry journal article supplement (doi:10.1039/d2mo00256f), 2023-05-19
Supplement: d2mo00256f4.pdf [file d2mo00256f4.pdf]

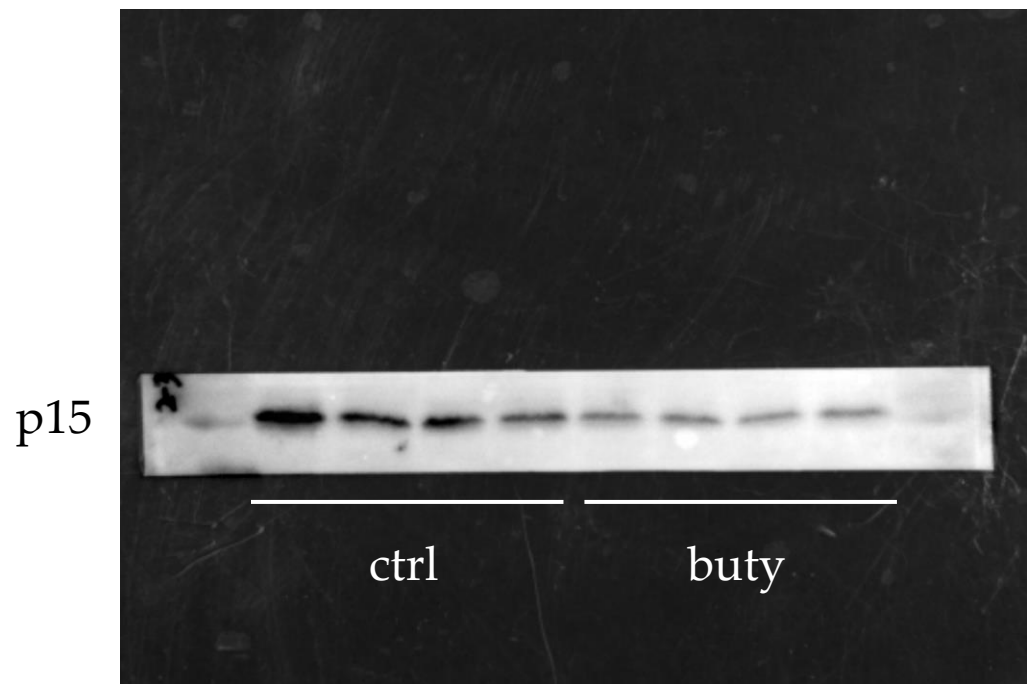

15kDa tubulin

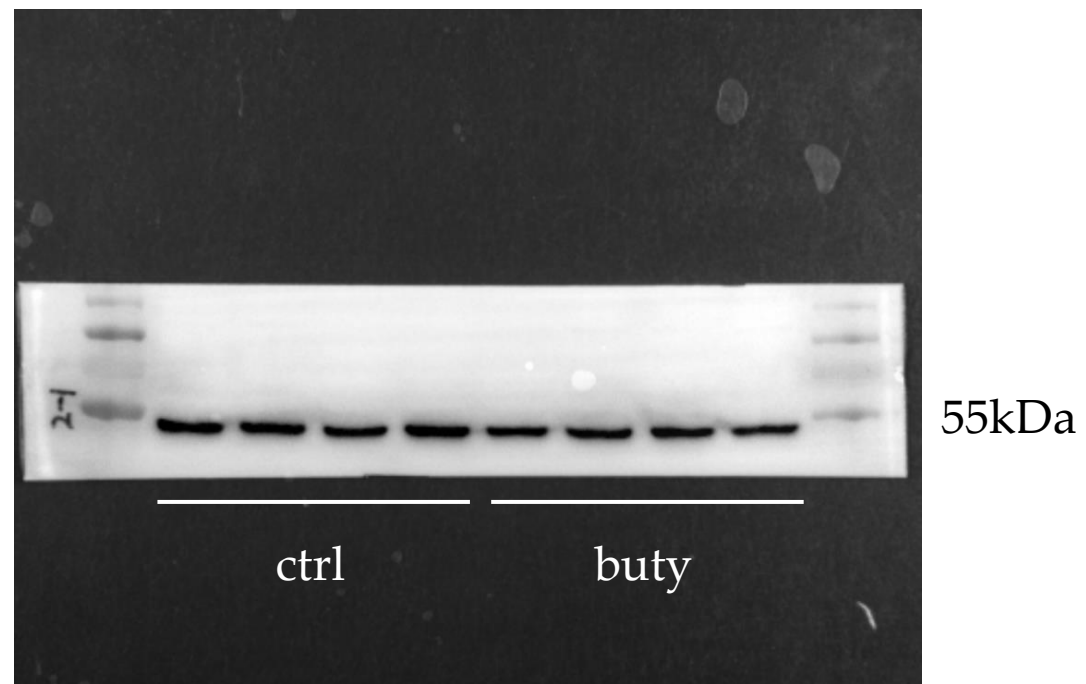

p16

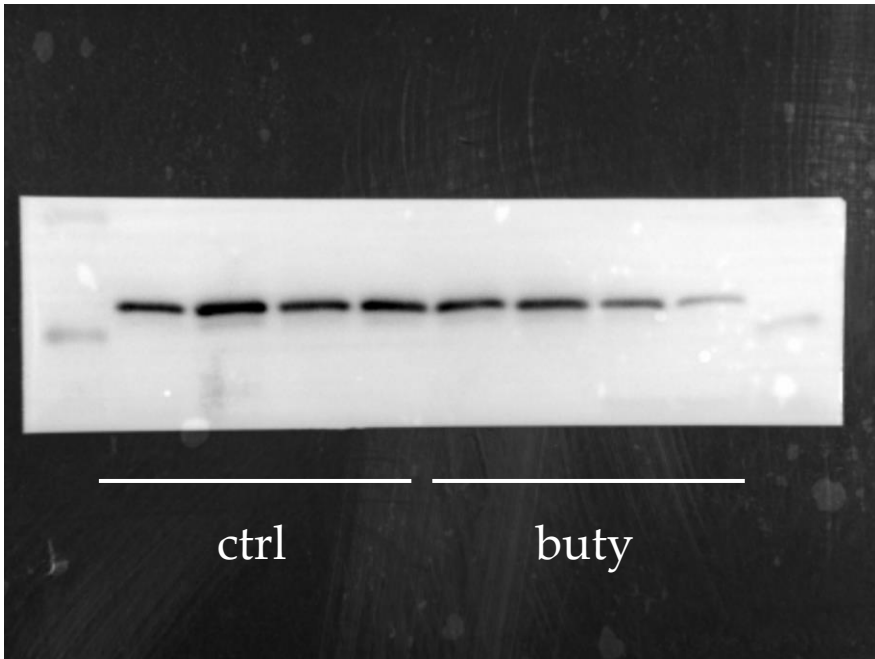

16kDa

tubulin

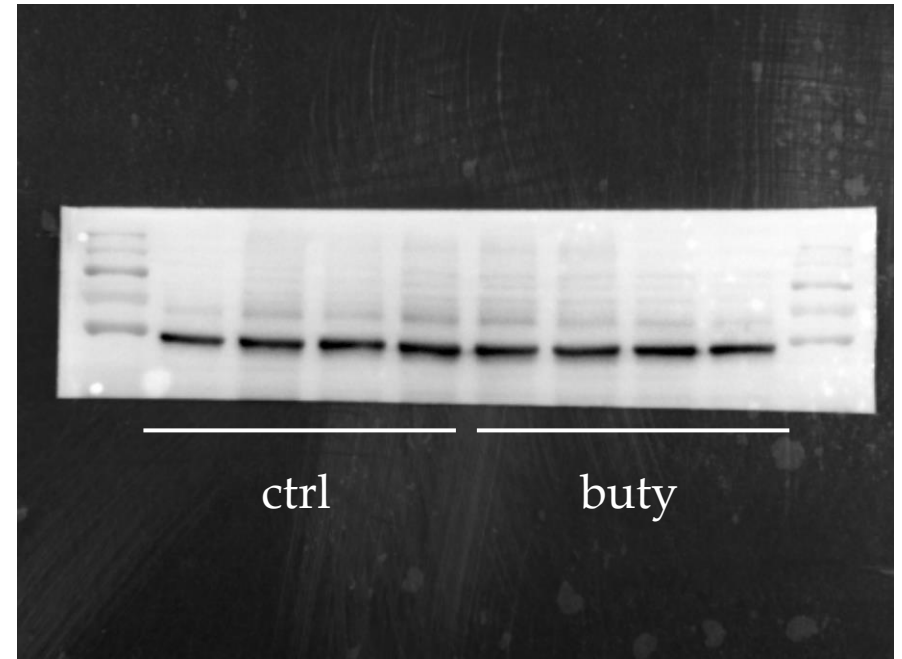

55kDa

p19

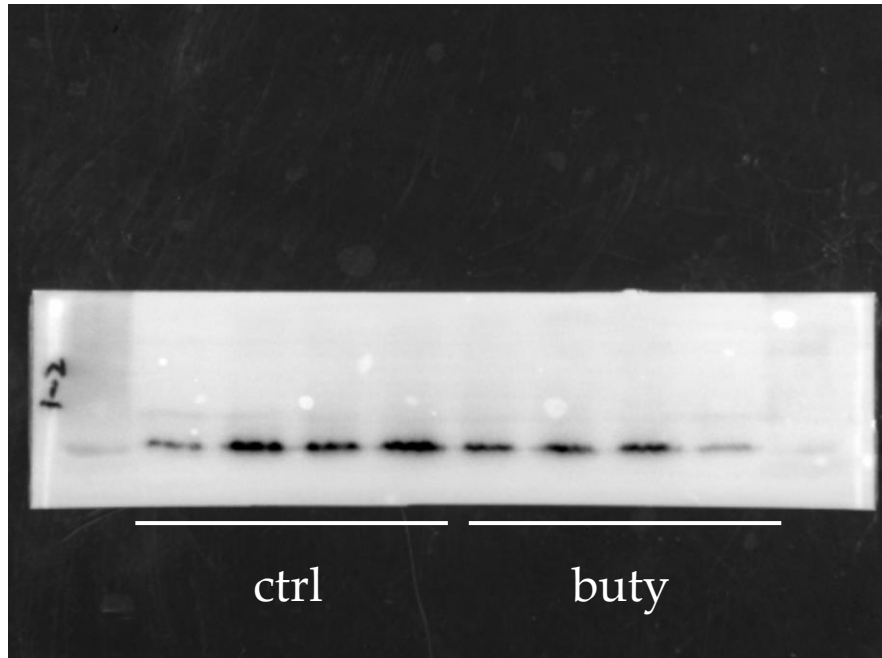

ctrl

buty

19kDa tubulin

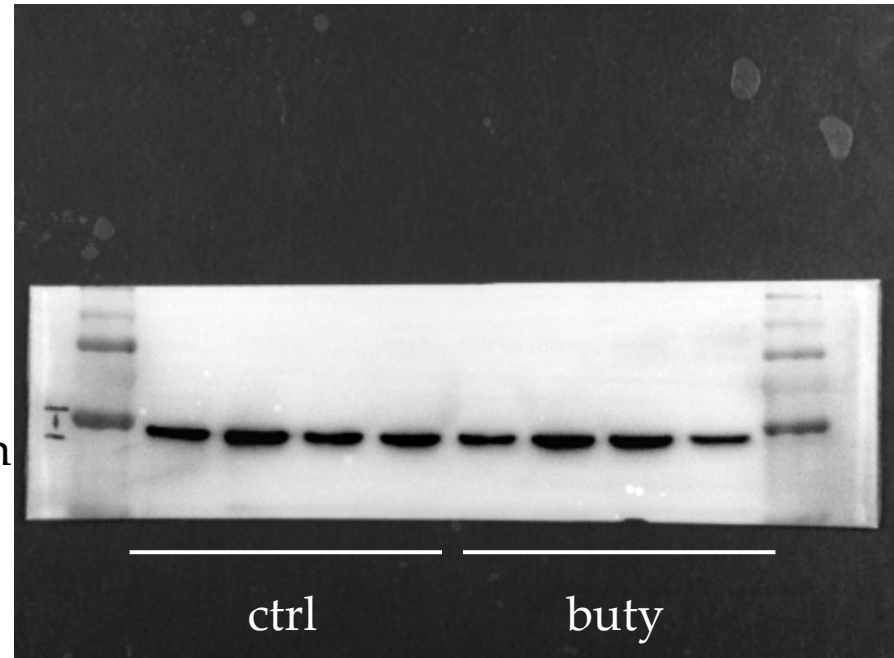

ctrl

buty

55kDa

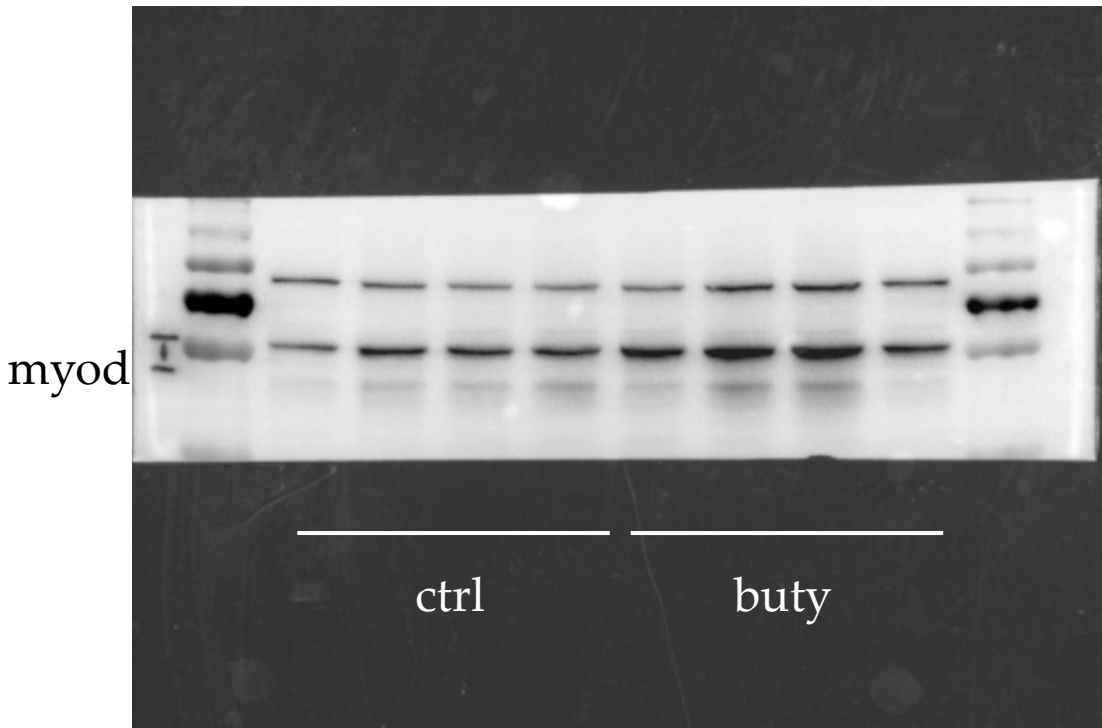

55kDa tubulin

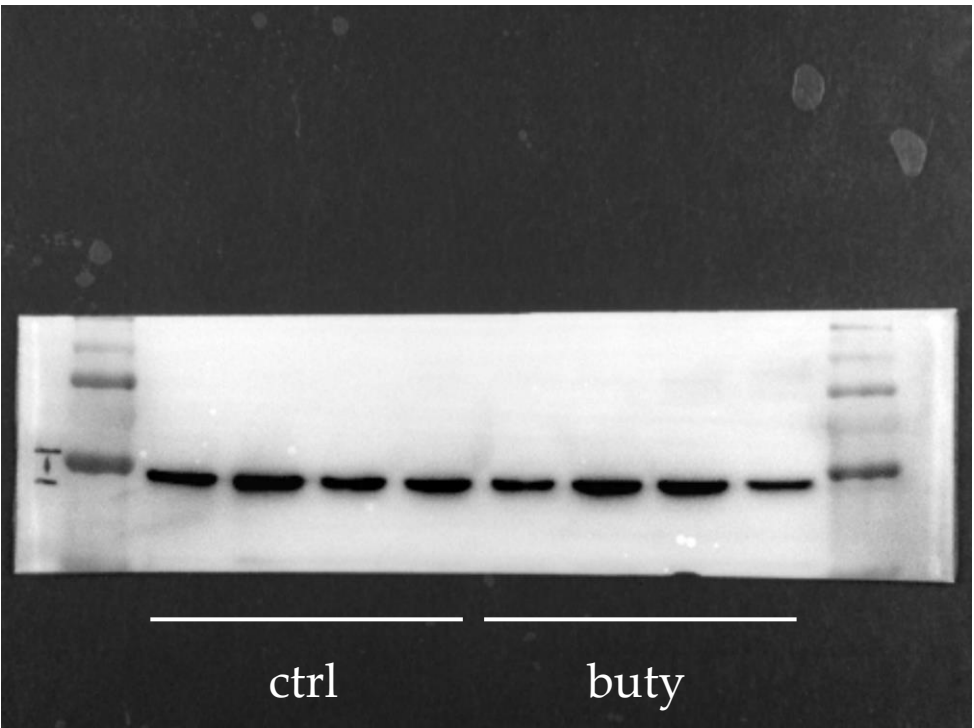

55kDa

myf5

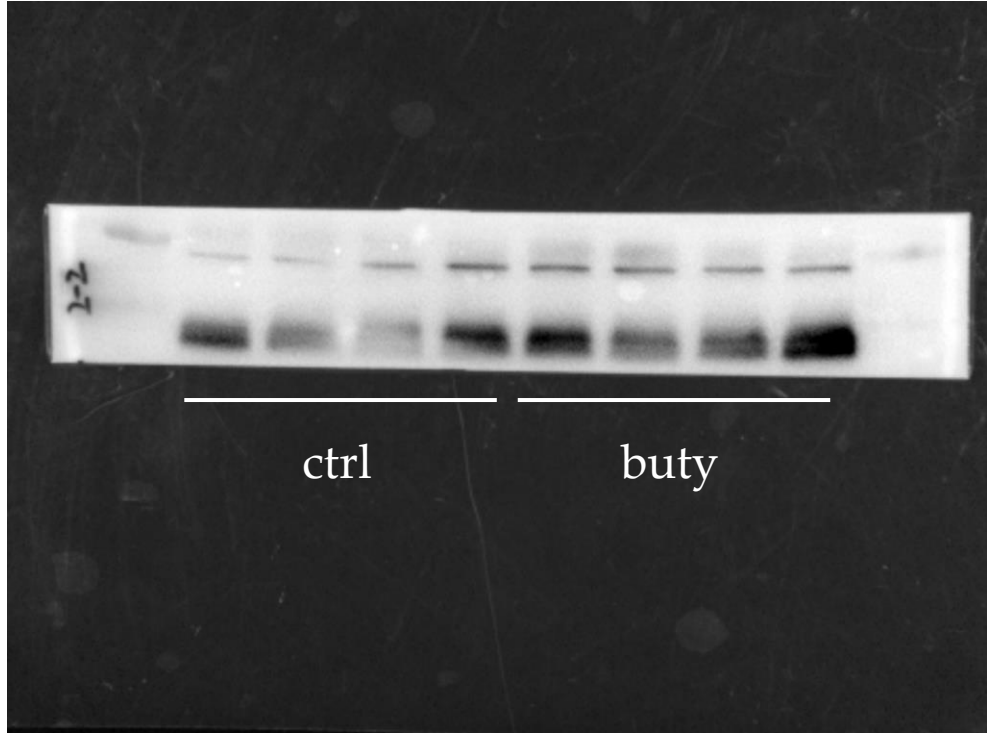

28kDa tubulin

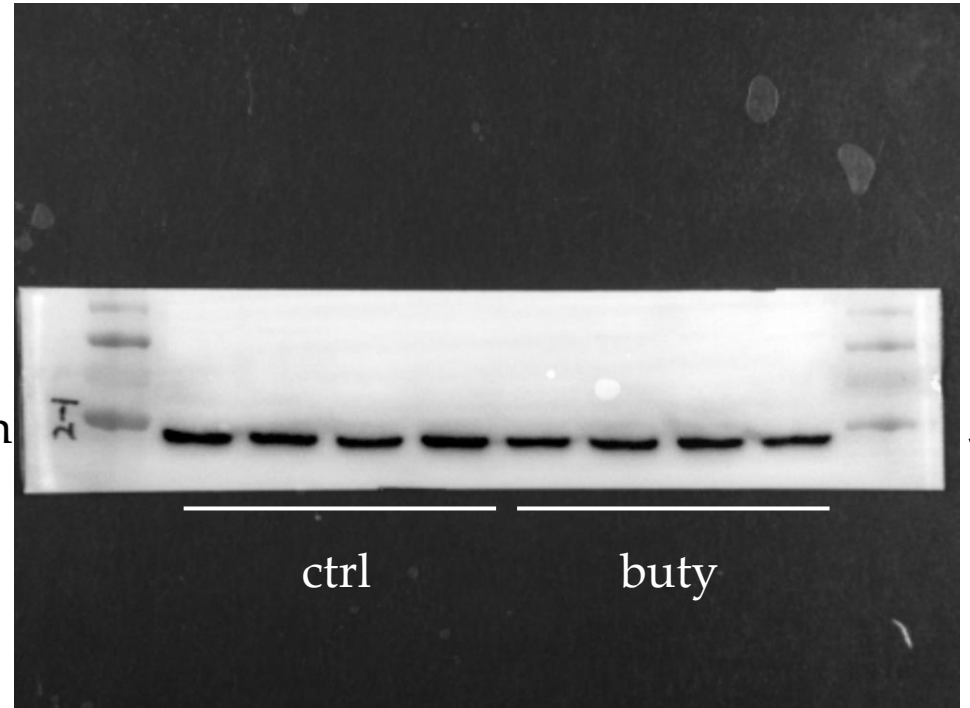

55kDa

p-ERK

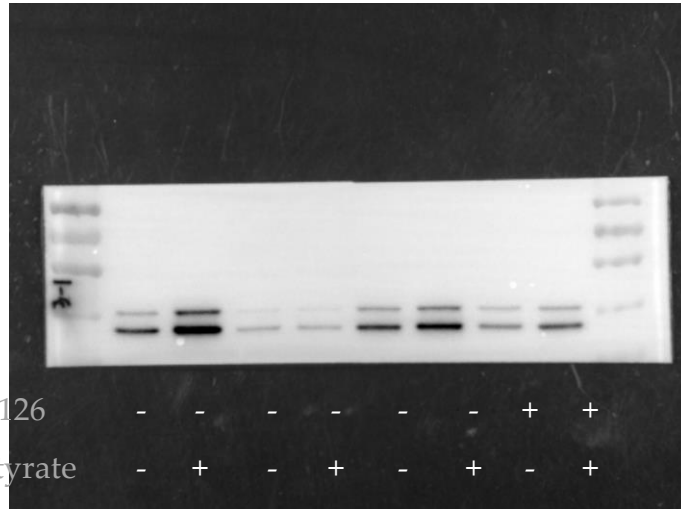

42/44kDa

|          |   |   |   |   |   |   |   |   |
|----------|---|---|---|---|---|---|---|---|
| U0126    | - | - | - | - | - | - | + | + |
| butyrate | - | + | - | + | - | + | - | + |

t-ERK

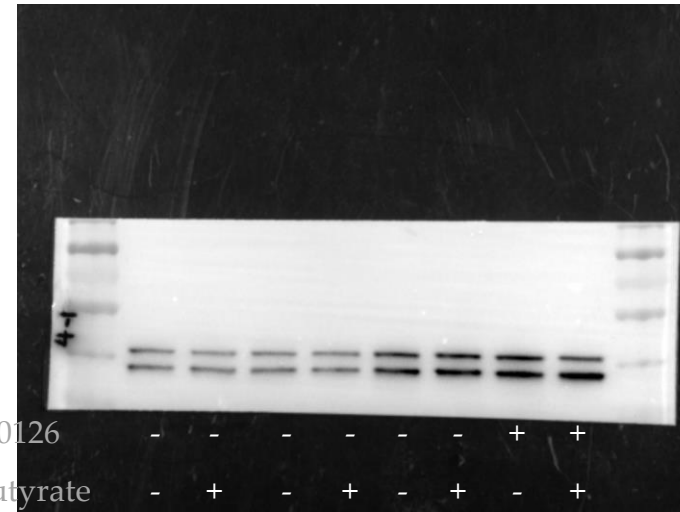

42/44kDa

|          |   |   |   |   |   |   |   |   |
|----------|---|---|---|---|---|---|---|---|
| U0126    | - | - | - | - | - | - | + | + |
| butyrate | - | + | - | + | - | + | - | + |

p-ERK

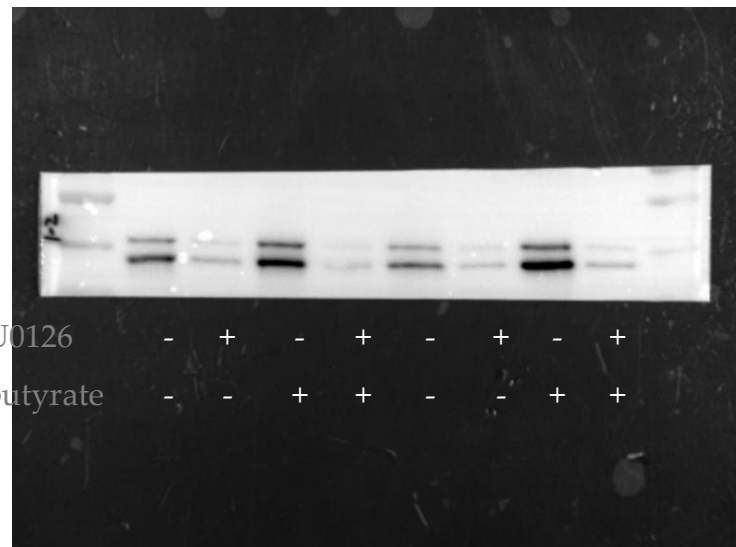

42/44kDa

t-ERK

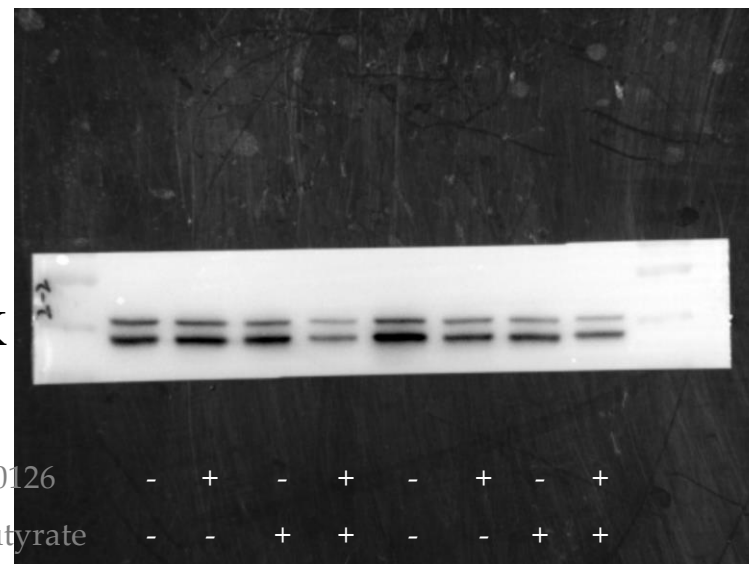

42/44kDa

p-ERK

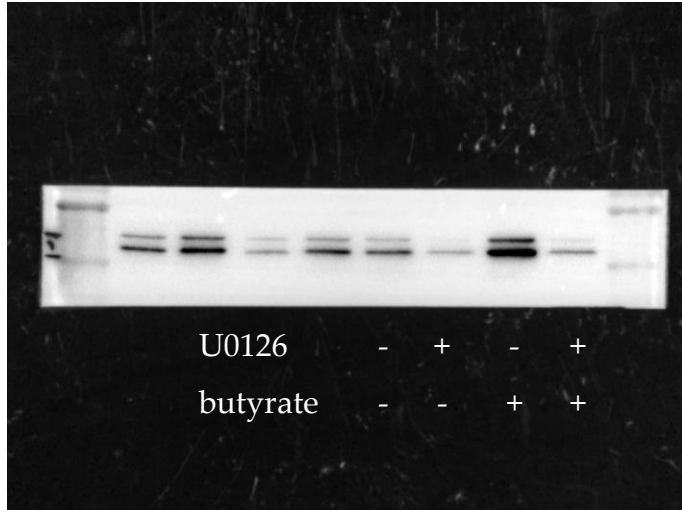

42/44kDa

t-ERK

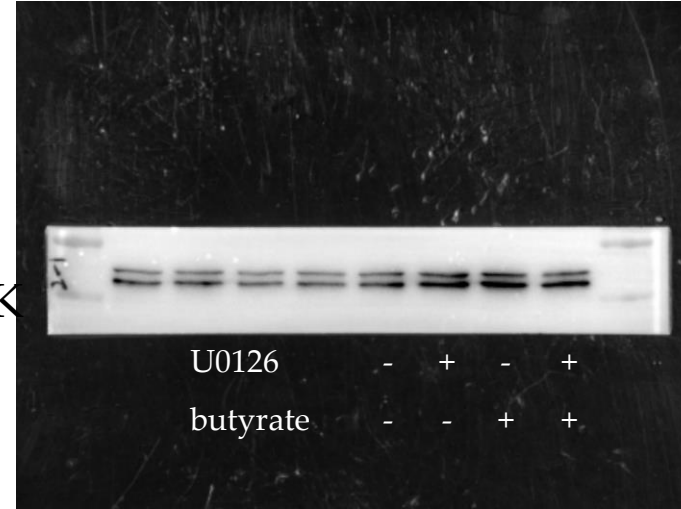

42/44kDa



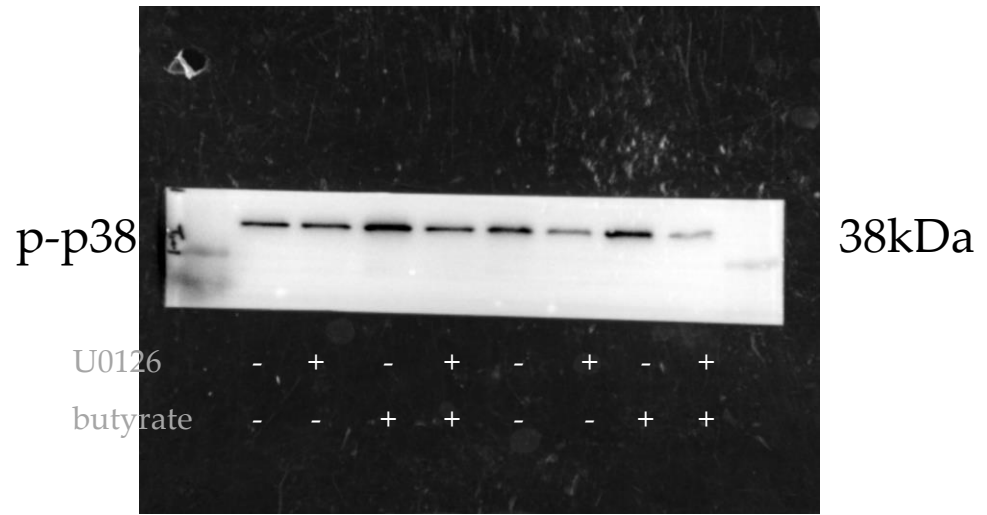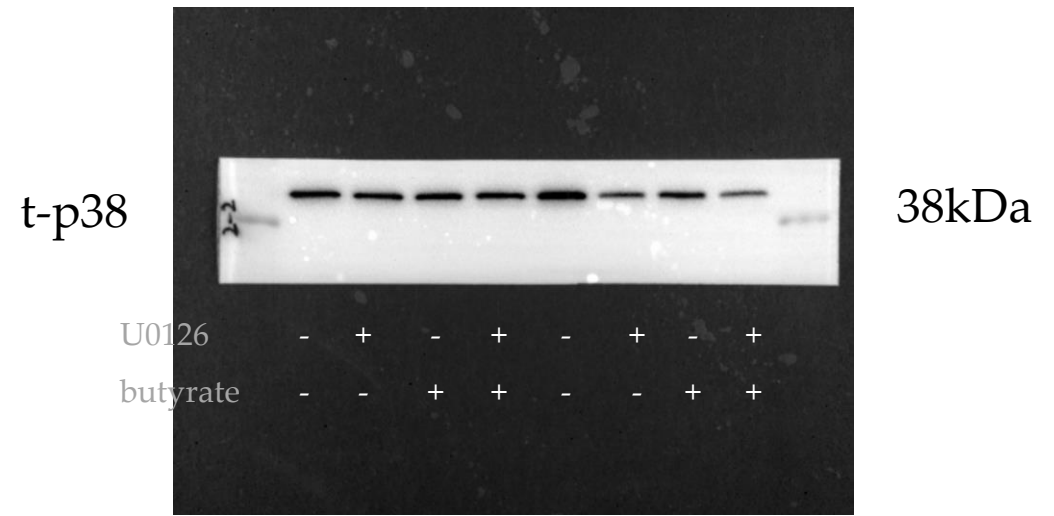

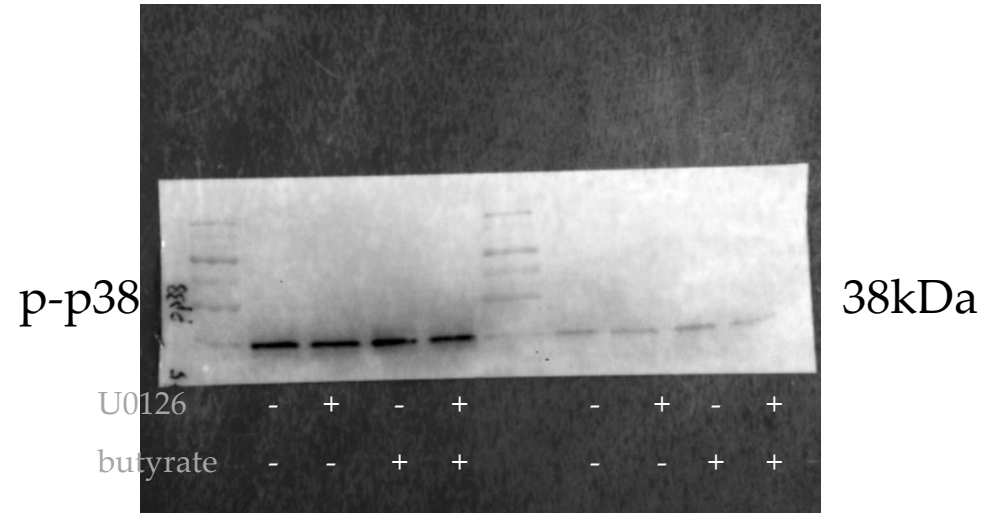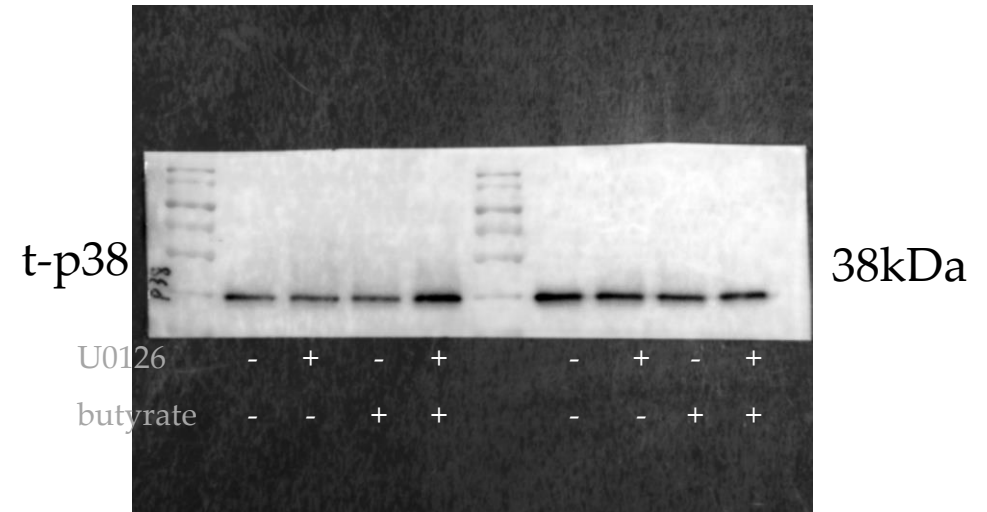

p-JNK

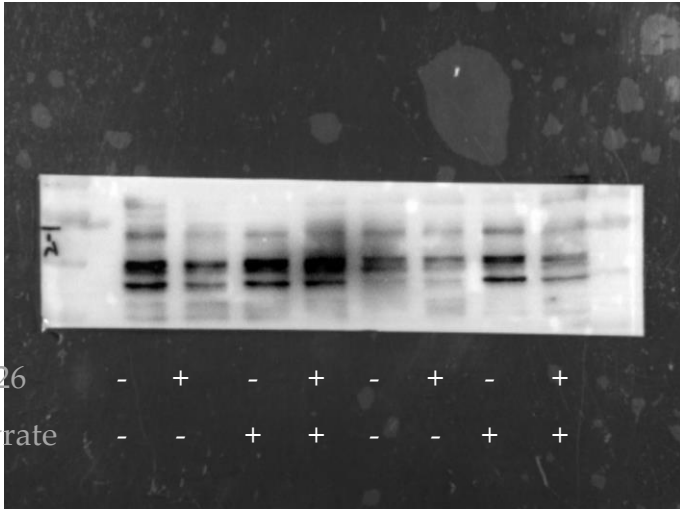

46/54kDa

t-JNK

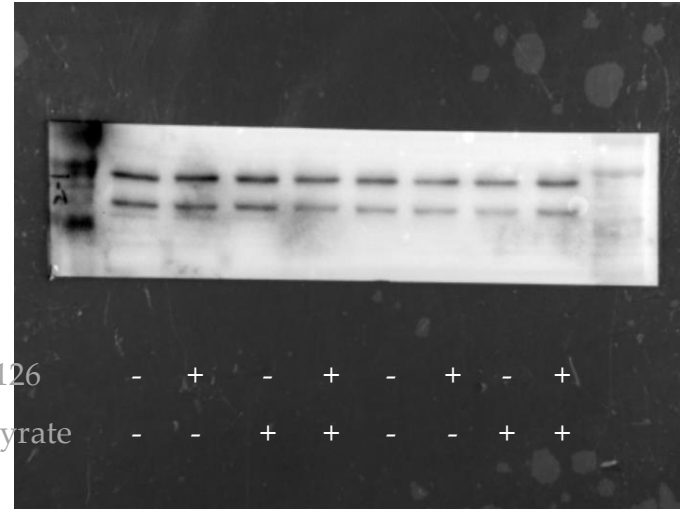

46/54kDa

p-JNK

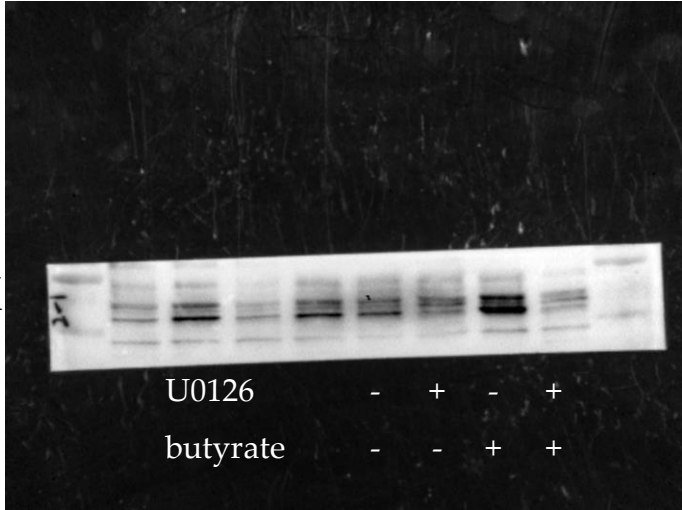

46/54kDa

t-JNK

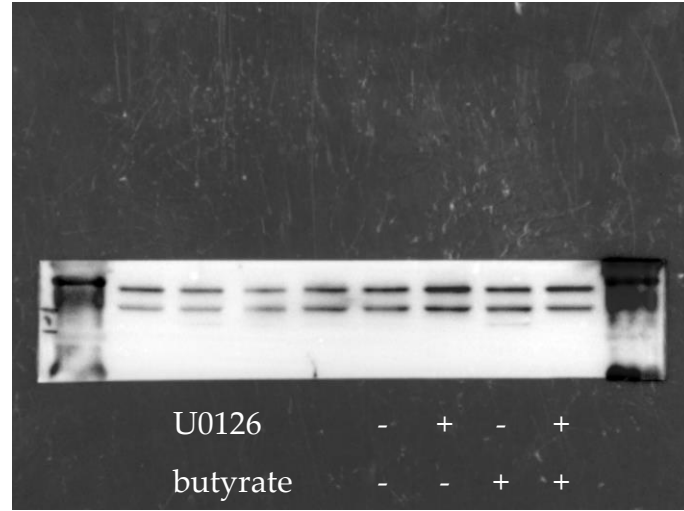

46/54kDa

p-JNK

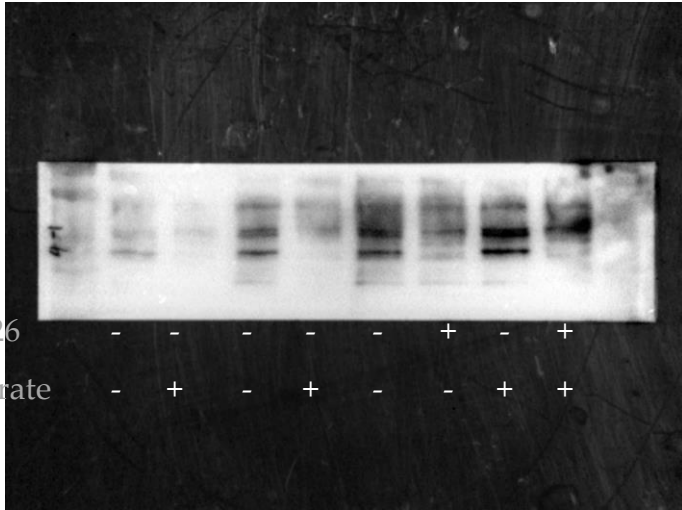

46/54kDa

t-JNK

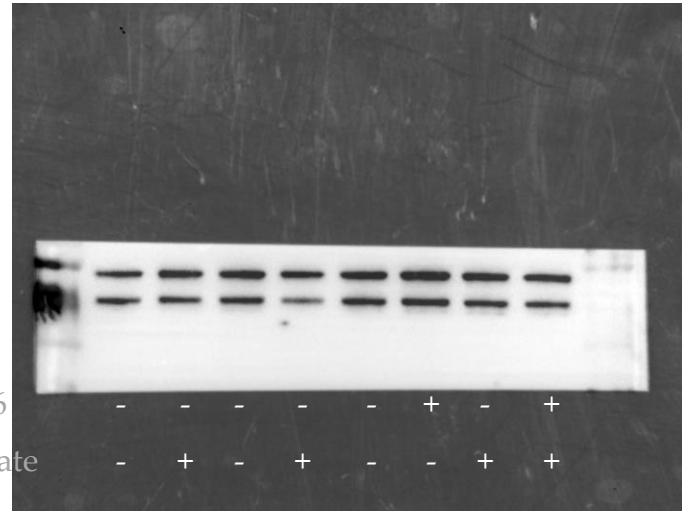

46/54kDa
