# Supplementary figures and images for: Butyrate promotes C2C12 myoblast proliferation by activating ERK/MAPK pathway
Source: Royal Society of Chemistry journal article supplement (doi:10.1039/d2mo00256f), 2023-05-19

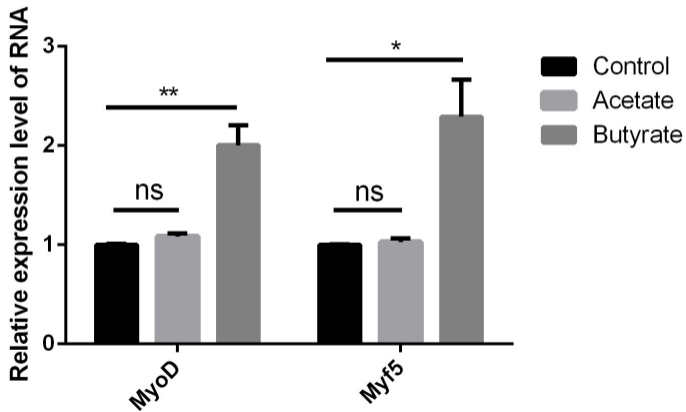

Supplement: d2mo00256f1.pdf [file d2mo00256f1.pdf]
